# Supplementary material for: Exposures to Potentially Psychologically Traumatic Events among Canadian Coast Guard and Conservation and Protection Officers
Source: MDPI journal article supplement (doi:10.3390/ijerph192215116), 2022-11-16
Supplement: s1 [file s1]

Supplementary Table S1. Prevalence of Potentially Psychologically Traumatic Events (PPTs) Exposure Types- Expanded Table

| Type of Exposure                                                                               | Total Sample | CCG       | C&P      | PSP [4]      | Comparing Prevalence among Total Sample and PSP | General Population [7] | Comparing Prevalence among Total Sample and General Population [7] | General Population [6] | Comparing Prevalence among Total Sample and General Population [6] |
|------------------------------------------------------------------------------------------------|--------------|-----------|----------|--------------|-------------------------------------------------|------------------------|--------------------------------------------------------------------|------------------------|--------------------------------------------------------------------|
|                                                                                                | % (n)        | % (n)     | % (n)    | % (n)        | Test Statistics                                 | %                      | Test Statistics                                                    | %                      | Test Statistics                                                    |
| Life threatening natural disaster (e.g., flood, hurricane, tornado, earthquake, and wildfires) |              |           |          |              |                                                 |                        |                                                                    |                        |                                                                    |
| Ever exposed <sup>1</sup>                                                                      | 65.0(268)    | 66.9(186) | 74.8(80) | 66.4 (2,832) | -0.53                                           | 15.6                   | 27.59***                                                           | 7.7                    | 43.57***                                                           |
| 1 to 5 times                                                                                   | 86.1(211)    | 88.4(153) | 80.6(58) | 91.7 (2,376) |                                                 |                        |                                                                    |                        |                                                                    |
| 6 to 10 times                                                                                  | 6.5(16)      | 5.8(10)   | 8.3(6)   | 3.5 (90)     |                                                 |                        |                                                                    |                        |                                                                    |
| 11 or more times                                                                               | 7.3(18)      | 5.8(10)   | 11.1(8)  | 4.8 (125)    |                                                 |                        |                                                                    |                        |                                                                    |
| Happened to me                                                                                 | 40.7(109)    | 38.7(72)  | 46.3(37) | -            |                                                 |                        |                                                                    |                        |                                                                    |
| Witnesses it                                                                                   | 37.7(101)    | 33.9(63)  | 47.5(38) | -            |                                                 |                        |                                                                    |                        |                                                                    |
| Learned about it                                                                               | 43.7(117)    | 45.2(84)  | 38.8(31) | -            |                                                 |                        |                                                                    |                        |                                                                    |
| Part of my public safety job                                                                   | 31.0(83)     | 29.0(54)  | 36.3(29) | -            |                                                 |                        |                                                                    |                        |                                                                    |
| Fire or explosion                                                                              |              |           |          |              |                                                 |                        |                                                                    |                        |                                                                    |
| Ever exposed                                                                                   | 68.9 (284)   | 73.4(204) | 72.9(78) | 86.0 (3,727) | -9.91***                                        | n/a                    | -                                                                  | n/a                    | -                                                                  |
| 1 to 5 times                                                                                   | 83.4(216)    | 84.4(157) | 80.8(59) | 50.4 (1,805) |                                                 |                        |                                                                    |                        |                                                                    |
| 6 to 10 times                                                                                  | 5.0(13)      | 5.9(11)   | ^        | 10.1 (361)   |                                                 |                        |                                                                    |                        |                                                                    |
| 11 or more times                                                                               | 11.6(30)     | 9.7(18)   | 16.4(12) | 39.6 (1,419) |                                                 |                        |                                                                    |                        |                                                                    |
| Happened to me                                                                                 | 30.3(84)     | 27.9(57)  | 34.6(27) | -            |                                                 |                        |                                                                    |                        |                                                                    |
| Witnesses it                                                                                   | 43.3(123)    | 39.7(81)  | 53.8(42) | -            |                                                 |                        |                                                                    |                        |                                                                    |
| Learned about it                                                                               | 40.1(114)    | 40.2(82)  | 38.5(30) | -            |                                                 |                        |                                                                    |                        |                                                                    |
| Part of my public safety job                                                                   | 39.1(111)    | 43.1(88)  | 29.5(23) | -            |                                                 |                        |                                                                    |                        |                                                                    |
| Serious transportation accident (e.g., car accident, boat accident, train wreck, plane crash)  |              |           |          |              |                                                 |                        |                                                                    |                        |                                                                    |
| Ever exposed                                                                                   | 77.4(319)    | 81.3(226) | 85.0(91) | 93.2 (4,084) | -12.62***                                       | 17.8                   | 31.58***                                                           | 14.0                   | 37.03***                                                           |
| 1 to 5 times                                                                                   | 68.0(210)    | 65.3(143) | 74.4(67) | 22.7 (907)   |                                                 |                        |                                                                    |                        |                                                                    |
| 6 to 10 times                                                                                  | 7.4(23)      | 5.9(13)   | 11.1(10) | 6.0 (241)    |                                                 |                        |                                                                    |                        |                                                                    |

|                                                                                |           |            |          |              |           |      |          |     |          |
|--------------------------------------------------------------------------------|-----------|------------|----------|--------------|-----------|------|----------|-----|----------|
| 11 or more times                                                               | 24.6(76)  | 28.8(63)   | 14.4(13) | 71.3 (2,845) |           |      |          |     |          |
| Happened to me                                                                 | 35.1(112) | 30.5(69)   | 47.3(43) | -            |           |      |          |     |          |
| Witnesses it                                                                   | 44.5(142) | 40.3(91)   | 56.0(51) | -            |           |      |          |     |          |
| Learned about it                                                               | 37.3(119) | 36.3(82)   | 38.5(35) | -            |           |      |          |     |          |
| Part of my public safety job                                                   | 47.6(152) | 47.8(108)  | 48.4(44) | -            |           |      |          |     |          |
| Serious accident at work, home,<br>or during recreational activity             |           |            |          | -            |           |      |          |     |          |
| Ever exposed                                                                   | 69.7(287) | 73.4(204)  | 75.7(81) | 81.6 (3,430) | -6.19***  | 7.9  | 46.38*** | 6.2 | 53.31*** |
| 1 to 5 times                                                                   | 86.6(232) | 86.5(167)  | 86.7(65) | 66.6 (2,091) |           |      |          |     |          |
| 6 to 10 times                                                                  | 5.2(14)   | 5.2(10)    | ^        | 6.5 (205)    |           |      |          |     |          |
| 11 or more times                                                               | 8.2(22)   | 8.3(16)    | 8.0(6)   | 26.9 (844)   |           |      |          |     |          |
| Happened to me                                                                 | 35.5(102) | 34.8(71)   | 38.3(31) | -            |           |      |          |     |          |
| Witnesses it                                                                   | 49.5(142) | 46.6(95)   | 58.0(47) | -            |           |      |          |     |          |
| Learned about it                                                               | 39.0(112) | 38.2(78)   | 39.5(32) | -            |           |      |          |     |          |
| Part of my public safety job                                                   | 33.8(97)  | 30.4(62)   | 43.2(35) | -            |           |      |          |     |          |
| Exposure to toxic substance<br>(e.g., dangerous chemicals,<br>radiation)       |           |            |          | -            |           |      |          |     |          |
| Ever exposed                                                                   | 50.0(206) | 53.2(148)  | 52.3(56) | 67.4 (2,664) | -7.48***  | 10.1 | 26.80*** | 4.2 | 46.22*** |
| 1 to 5 times                                                                   | 71.7(132) | 68.6(94)   | 80.9(38) | 61.3 (1,439) |           |      |          |     |          |
| 6 to 10 times                                                                  | 4.9(9)    | 5.8(8)     | ^        | 7.4 (174)    |           |      |          |     |          |
| 11 or more times                                                               | 23.4(43)  | 25.5(35)   | 17.0(8)  | 31.3 (735)   |           |      |          |     |          |
| Happened to me                                                                 | 43.7(90)  | 45.3(67)   | 41.1(23) | -            |           |      |          |     |          |
| Witnesses it                                                                   | 25.2(52)  | 26.4(39)   | 23.2(13) | -            |           |      |          |     |          |
| Learned about it                                                               | 40.3(83)  | 33.8(50)   | 55.4(31) | -            |           |      |          |     |          |
| Part of my public safety job                                                   | 56.8(117) | 60.1(89)   | 50.0(28) | -            |           |      |          |     |          |
| Physical assault (e.g., being<br>attacked, hit, slapped, kicked,<br>beaten up) |           |            |          | -            |           |      |          |     |          |
| Ever exposed                                                                   | 69.4(286) | 69.8(194)  | 84.1(90) | 90.6 (3,931) | -14.65*** | 9.2  | 42.20*** | 5.9 | 54.61*** |
| 1 to 5 times                                                                   | 75.0(189) | 76.0(46.8) | 72.8(59) | 41.8 (1,543) |           |      |          |     |          |
| 6 to 10 times                                                                  | 8.7(22)   | 7.6(13)    | 11.1(9)  | 9.5 (350)    |           |      |          |     |          |
| 11 or more times                                                               | 16.3(41)  | 16.4(28)   | 16.0(13) | 48.7 (1,797) |           |      |          |     |          |
| Happened to me                                                                 | 61.9(177) | 60.8(118)  | 65.6(59) | -            |           |      |          |     |          |
| Witnesses it                                                                   | 46.2(132) | 42.8(83)   | 54.4(49) | -            |           |      |          |     |          |
| Learned about it                                                               | 40.6(116) | 39.7(77)   | 41.1(37) | -            |           |      |          |     |          |
| Part of my public safety job                                                   | 28.0(80)  | 17.0(33)   | 52.2(47) | -            |           |      |          |     |          |

|                                                                                                                     |           |           |          |              |           |      |          |      |          |
|---------------------------------------------------------------------------------------------------------------------|-----------|-----------|----------|--------------|-----------|------|----------|------|----------|
| Assault with a weapon (e.g., being shot, stabbed, threatened with a knife, gun, bomb)                               |           |           |          |              |           |      |          |      |          |
| Ever exposed                                                                                                        | 52.7(217) | 48.6(135) | 74.8(80) | 83.9 (3,639) | -17.18*** | 16.0 | 20.24*** | 14.5 | 21.93*** |
| 1 to 5 times                                                                                                        | 92.2(153) | 94.1(95)  | 89.2(58) | 57.6 (1,797) |           |      |          |      |          |
| 6 to 10 times                                                                                                       | ^         | ^         | ^        | 9.4 (294)    |           |      |          |      |          |
| 11 or more times                                                                                                    | 6.0(10)   | ^         | 9.2(6)   | 32.9 (1,027) |           |      |          |      |          |
|                                                                                                                     |           |           |          |              |           |      |          |      |          |
| Happened to me                                                                                                      | 36.9(80)  | 34.8(47)  | 41.3(33) | -            |           |      |          |      |          |
| Witnesses it                                                                                                        | 25.8(56)  | 25.9(35)  | 26.3(21) | -            |           |      |          |      |          |
| Learned about it                                                                                                    | 55.8(121) | 55.6(75)  | 55.0(44) | -            |           |      |          |      |          |
| Part of my public safety job                                                                                        | 28.1(61)  | 18.5(25)  | 45.0(36) | -            |           |      |          |      |          |
| Sexual assault (e.g., rape, attempted rape, made to perform any type of sexual act through force or threat of harm) |           |           |          |              |           |      |          |      |          |
| Ever exposed                                                                                                        | 52.4(216) | 55.8(155) | 55.1(59) | 71.2 (3,035) | -8.52***  | 11.4 | 26.13*** | 5.8  | 40.39*** |
| 1 to 5 times                                                                                                        | 91.7(143) | 91.8(112) | 91.2(31) | 47.1 (1,089) |           |      |          |      |          |
| 6 to 10 times                                                                                                       | ^         | ^         | ^        | 11.0 (255)   |           |      |          |      |          |
| 11 or more times                                                                                                    | 5.8(9)    | 4.9(6)    | -        | 41.9 (968)   |           |      |          |      |          |
|                                                                                                                     |           |           |          |              |           |      |          |      |          |
| Happened to me                                                                                                      | 35.2(76)  | 38.1(59)  | 28.8(17) | -            |           |      |          |      |          |
| Witnesses it                                                                                                        | 8.8(19)   | 8.4(13)   | 10.2(6)  | -            |           |      |          |      |          |
| Learned about it                                                                                                    | 70.8(153) | 70.3(109) | 71.2(42) | -            |           |      |          |      |          |
| Part of my public safety job                                                                                        | 9.7(21)   | 8.4(13)   | 13.6(8)  | -            |           |      |          |      |          |
| Other unwanted or uncomfortable sexual experience                                                                   |           |           |          |              |           |      |          |      |          |
| Ever exposed                                                                                                        | 59.2(244) | 64.7(180) | 57.9(62) | 67.3 (2,803) | -3.44***  | 21.9 | 18.26*** | 4.2  | 55.56*** |
| 1 to 5 times                                                                                                        | 72.0(152) | 72.5(116) | 72.0(36) | 55.2 (1,225) |           |      |          |      |          |
| 6 to 10 times                                                                                                       | 5.2(11)   | 5.0(8)    | ^        | 7.7 (171)    |           |      |          |      |          |
| 11 or more times                                                                                                    | 22.7(48)  | 22.5(36)  | 22.0(11) | 37.2 (825)   |           |      |          |      |          |
|                                                                                                                     |           |           |          |              |           |      |          |      |          |
| Happened to me                                                                                                      | 63.9(156) | 69.4(125) | 48.4(30) | -            |           |      |          |      |          |
| Witnesses it                                                                                                        | 18.0(44)  | 17.8(32)  | 17.7(11) | -            |           |      |          |      |          |
| Learned about it                                                                                                    | 45.9(112) | 40.6(73)  | 59.7(37) | -            |           |      |          |      |          |
| Part of my public safety job                                                                                        | 12.3(30)  | 11.7(21)  | 14.5(9)  | -            |           |      |          |      |          |
| Combat                                                                                                              |           |           |          |              |           |      |          |      |          |
| Ever exposed                                                                                                        | 22.6(93)  | 21.9(61)  | 28.0(30) | 18.8 (791)   | 1.90*     | 4.3  | 18.16*** | 3.2  | 22.20*** |
| 1 to 5 times                                                                                                        | 73.1(38)  | 71.4(25)  | 76.5(13) | 78.4 (349)   |           |      |          |      |          |
| 6 to 10 times                                                                                                       | ^         | ^         | ^        | 21.6 (96)    |           |      |          |      |          |
| 11 or more times                                                                                                    | 23.1(12)  | 22.9(8)   | -        | -            |           |      |          |      |          |

|                                                                            |           |           |          |              |           |      |          |      |          |
|----------------------------------------------------------------------------|-----------|-----------|----------|--------------|-----------|------|----------|------|----------|
| Happened to me                                                             | 16.1(15)  | 21.3(13)  | ^        | -            |           |      |          |      |          |
| Witnesses it                                                               | 14.0(13)  | 11.5(7)   | 20.0(6)  | -            |           |      |          |      |          |
| Learned about it                                                           | 76.3(71)  | 70.5(43)  | 86.7(26) | -            |           |      |          |      |          |
| Part of my public safety job                                               | 17.2(16)  | 21.3(13)  | ^        | -            |           |      |          |      |          |
| Captivity (e.g., being kidnapped, abducted, held hostage, prisoner of war) |           |           |          | -            |           |      |          |      |          |
| Ever exposed                                                               | 15.5(64)  | 14.7(41)  | 19.6(21) | 30.5 (1,279) | -6.55***  | 1.4  | 24.21*** | 1.1  | 27.85*** |
| 1 to 5 times                                                               | 92.5(37)  | 96.2(25)  | 85.7(12) | 78.9 (712)   |           |      |          |      |          |
| 6 times or more                                                            | -         | -         | ^        | 21.2 (191)   |           |      |          |      |          |
| 11 or more times                                                           | ^         | ^         | -        | -            |           |      |          |      |          |
| Happened to me                                                             | 12.5(8)   | 14.6(6)   | ^        | -            |           |      |          |      |          |
| Witnesses it                                                               | 10.9(7)   | 12.2(5)   | ^        | -            |           |      |          |      |          |
| Learned about it                                                           | 82.8(73)  | 78.0(32)  | 90.5(19) | -            |           |      |          |      |          |
| Part of my public safety job                                               | ^         | 2.4(1)    | ^        | -            |           |      |          |      |          |
| Life threatening illness or injury                                         |           |           |          | -            |           |      |          |      |          |
| Ever exposed                                                               | 66.5(274) | 69.8(194) | 72.9(78) | 76.7 (3,301) | -4.84***  | 32.0 | 14.96*** | 11.8 | 34.34*** |
| 1 to 5 times                                                               | 83.4(206) | 84.4(152) | 80.3(53) | 54.2 (1,594) |           |      |          |      |          |
| 6 times or more                                                            | 5.3(13)   | 4.4(8)    | 7.6(5)   | 6.3 (184)    |           |      |          |      |          |
| 11 or more times                                                           | 11.3(28)  | 11.1(20)  | 12.1(8)  | 39.6 (1,165) |           |      |          |      |          |
| Happened to me                                                             | 27.0(74)  | 29.4(57)  | 21.8(17) | -            |           |      |          |      |          |
| Witnesses it                                                               | 57.3(157) | 52.6(102) | 67.9(53) | -            |           |      |          |      |          |
| Learned about it                                                           | 44.5(122) | 40.2(78)  | 55.1(43) | -            |           |      |          |      |          |
| Part of my public safety job                                               | 27.0(74)  | 28.9(56)  | 23.1(18) | -            |           |      |          |      |          |
| Severe human suffering                                                     |           |           |          | -            |           |      |          |      |          |
| Ever exposed                                                               | 53.2(219) | 56.5(157) | 56.1(60) | 79.1 (3,234) | -12.89*** | 3.4  | 55.59*** | 3.7  | 53.05*** |
| 1 to 5 times                                                               | 70.8(126) | 66.4(87)  | 82.6(38) | 41.8 (1,187) |           |      |          |      |          |
| 6 times or more                                                            | 7.3(13)   | 9.2(12)   | ^        | 6.2 (177)    |           |      |          |      |          |
| 11 or more times                                                           | 21.9(39)  | 24.4(32)  | 15.2(7)  | 51.9 (1,473) |           |      |          |      |          |
| Happened to me                                                             | 10.0(22)  | 12.1(19)  | ^        | -            |           |      |          |      |          |
| Witnesses it                                                               | 49.8(109) | 44.6(70)  | 61.7(37) | -            |           |      |          |      |          |
| Learned about it                                                           | 47.0(103) | 43.9(69)  | 55.0(33) | -            |           |      |          |      |          |
| Part of my public safety job                                               | 35.6(78)  | 39.5(62)  | 26.7(16) | -            |           |      |          |      |          |
| Sudden violent death (e.g., homicide, suicide)                             |           |           |          | -            |           |      |          |      |          |
| Ever exposed                                                               | 65.8(271) | 69.1(192) | 72.0(77) | 93.8 (4,101) | -23.49*** | n/a  | -        | n/a  | -        |
| 1 to 5 times                                                               | 80.9(195) | 78.8(134) | 85.9(61) | 36.4 (1,426) |           |      |          |      |          |
| 6 times or more                                                            | 6.6(16)   | 5.9(10)   | 8.5(6)   | 13.1 (512)   |           |      |          |      |          |

|                                                                                              |            |            |            |              |                              |             |                             |         |           |
|----------------------------------------------------------------------------------------------|------------|------------|------------|--------------|------------------------------|-------------|-----------------------------|---------|-----------|
| 11 or more times                                                                             | 12.4(30)   | 15.3(26)   | ^          | 50.5 (1,977) |                              |             |                             |         |           |
| Happened to me                                                                               | 9.2(25)    | 10.9(21)   | ^          | -            |                              |             |                             |         |           |
| Witnesses it                                                                                 | 27.3(74)   | 22.4(43)   | 40.3(31)   | -            |                              |             |                             |         |           |
| Learned about it                                                                             | 65.7(178)  | 63.0(121)  | 71.4(55)   | -            |                              |             |                             |         |           |
| Part of my public safety job                                                                 | 33.2(90)   | 35.9(69)   | 27.3(21)   | -            |                              |             |                             |         |           |
| Sudden accidental death                                                                      |            |            |            | -            |                              |             |                             |         |           |
| Ever exposed                                                                                 | 69.4(286)  | 73.4(204)  | 74.8(80)   | 93.7 (4,063) | -20.19***                    | 41.1        | 11.63***                    | 1.4     | 117.30*** |
| 1 to 5 times                                                                                 | 78.5(194)  | 76.1(137)  | 85.1(57)   | 34.6 (1,321) |                              |             |                             |         |           |
| 6 times or more                                                                              | 6.9(17)    | 7.2(13)    | ^          | 10.7 (408)   |                              |             |                             |         |           |
| 11 or more times                                                                             | 14.6(36)   | 16.7(30)   | 9.0(6)     | 54.8 (2,092) |                              |             |                             |         |           |
| Happened to me                                                                               | 8.4(24)    | 8.8(18)    | 7.5(6)     | -            |                              |             |                             |         |           |
| Witnesses it                                                                                 | 36.4(104)  | 31.9(65)   | 48.8(39)   | -            |                              |             |                             |         |           |
| Learned about it                                                                             | 56.6(162)  | 52.9(108)  | 65.0(52)   | -            |                              |             |                             |         |           |
| Part of my public safety job                                                                 | 39.9(114)  | 43.1(88)   | 32.5(26)   | -            |                              |             |                             |         |           |
| Serious injury, harm, or death<br>you caused to someone else                                 |            |            |            | -            |                              |             |                             |         |           |
| Ever exposed                                                                                 | 13.8(57)   | 12.9(36)   | 19.6(21)   | 36.2 (1,485) | -9.40***                     | n/a         | -                           | 26.3    | -5.69***  |
| 1 to 5 times                                                                                 | 80.0(28)   | 81.0(17)   | 78.6(11)   | 64.4 (580)   |                              |             |                             |         |           |
| 6 times or more                                                                              | ^          | -          | ^          | 6.8 (61)     |                              |             |                             |         |           |
| 11 or more times                                                                             | 17.1(6)    | ^          | ^          | 28.9 (260)   |                              |             |                             |         |           |
| Happened to me                                                                               | 31.6(18)   | 30.6(11)   | 33.3(7)    | -            |                              |             |                             |         |           |
| Witnesses it                                                                                 | 43.9(25)   | 47.2(17)   | 38.1(8)    | -            |                              |             |                             |         |           |
| Learned about it                                                                             | 42.1(24)   | 30.6(11)   | 61.9(13)   | -            |                              |             |                             |         |           |
| Part of my public safety job                                                                 | 31.6(18)   | 33.3(12)   | 28.6(6)    | -            |                              |             |                             |         |           |
| Any other very stressful event<br>or experience                                              |            |            |            | -            |                              |             |                             |         |           |
| Ever exposed                                                                                 | 31.1(128)  | 30.6(85)   | 39.3(42)   | -            | -                            | 8.6         | 16.18***                    | 40.8    | -3.97***  |
| 1 to 5 times                                                                                 | 72.1(98)   | 69.7(62)   | 78.3(36)   | -            |                              |             |                             |         |           |
| 6 times or more                                                                              | 8.1(11)    | 9.0(8)     | ^          | -            |                              |             |                             |         |           |
| 11 or more times                                                                             | 19.9(27)   | 21.3(19)   | 15.2(7)    | -            |                              |             |                             |         |           |
| Happened to me                                                                               | 69.5(89)   | 68.2(58)   | 71.4(30)   |              |                              |             |                             |         |           |
| Witnesses it                                                                                 | 28.1(36)   | 27.1(23)   | 28.6(12)   |              |                              |             |                             |         |           |
| Learned about it                                                                             | 19.5(25)   | 16.5(14)   | 23.8(10)   |              |                              |             |                             |         |           |
| Part of my public safety job                                                                 | 50.8(65)   | 54.1(46)   | 45.2(19)   |              |                              |             |                             |         |           |
| <b>Total number of different<br/>types of potentially traumatic<br/>exposures, Mean (SD)</b> | 8.72(4.42) | 9.05(3.87) | 9.76(4.07) | 11.08 (3.23) | <i>t</i> (411)=-<br>10.85*** | 2.31 (2.33) | <i>t</i> (411)=29.41*<br>** | 2.2-3.7 | -         |

Notes: CCG= Canadian Coast Guard; C&P=Conservation and Protection; PSP=public safety personnel; SD=Standard Deviation; n/a=not available.

<sup>1</sup> Not all individuals who report ever being exposed reported the number of exposures. So, the number of exposures does not necessarily match ever exposed.

<sup>^</sup>Sample size between 1 and 5, so data not presented. \* $p < .05$ , \*\* $p < .01$ , \*\*\* $p < .001$  – Statistically significantly different at these p-values.
